# Supplementary material
Source: Springer Nature journal article supplement (https://www.springermedizin.de/resource/supplementary/12888_2013_1670_MOESM10_ESM.pdf/9481150)

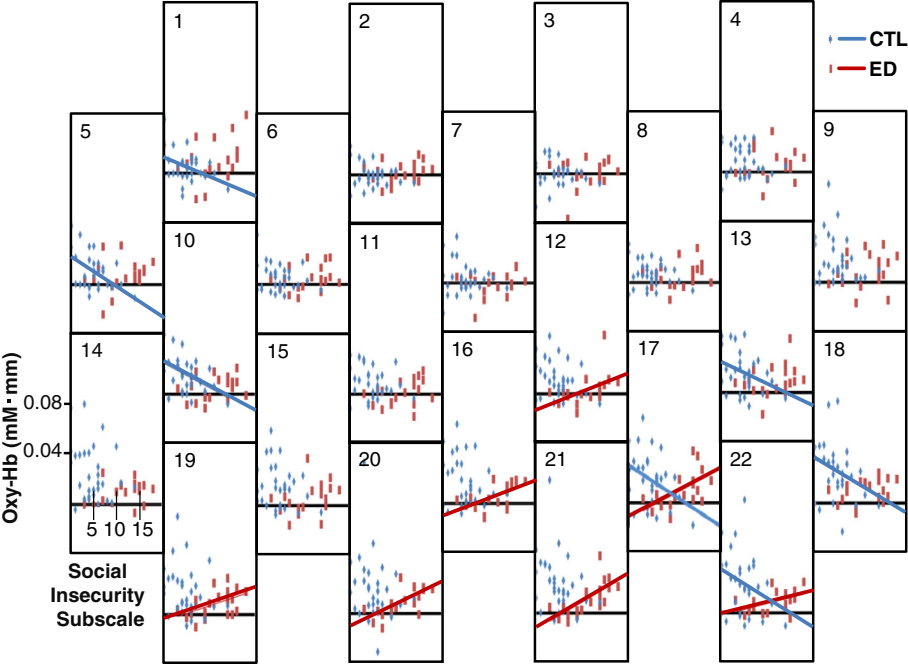

Supplement: MOESM10 [file 9481150]
